# Supplementary material
Source: PubMed Central journal article supplement (PMC1489890)

## SUPPLEMENTAL MATERIAL

**Table S1.** ATH1-Genechip® Data. See separate MS-EXCEL file.

**Table S2.** Specifications and primer sequences of mapping markers and the *pho2-1* dCAPS marker.

| Marker Name            | Chr. 2 Position (Mb) | BAC Clone | Polymorphism (Name & Type) | Primer Sequences (5' → 3')                         | Product Length (bp)       | [Mg <sup>2+</sup> ] (mM)<br>T <sub>a</sub> (°C) |
|------------------------|----------------------|-----------|----------------------------|----------------------------------------------------|---------------------------|-------------------------------------------------|
|                        |                      |           |                            |                                                    | Col / Ler / <i>pho2-1</i> |                                                 |
| nga1126                | 11.703               | F12K2     | CER448824<br>INDEL3        | CGCTACGCTTTTCGGTAAAG<br>GCACAGTCAAAGTCACAACC       | 191 / 199                 | 2.0 / 55                                        |
| nga361                 | 13.229               | T16B12    | not found                  | ACATATCAATATATTTAAAGTAGC<br>AAAGAGATGAGAATTTGGAC   | 114 / 120                 | 2.0 / 55                                        |
| mpi11                  | 13.733               | T32F6     | CER460447<br>INDEL9        | CTATCCACATTCGGTAAATCC<br>AAACACTTACTTGCAGACTCCT    | 248 / 239                 | 2.0 / 55                                        |
| mpi13                  | 14.014               | T21L14    | CER459346<br>INDEL17       | TTTTAACTCGGTCCGGATCAA<br>AATTACCTTCTCAATCGCAGTTT   | 211 / 194                 | 2.0 / 55                                        |
| mpi15                  | 14.276               | T1B8      | CER458994<br>INDEL10       | CCTTTCCCTAAACTAGTAAACTTC<br>GAAATCAACGAGGCTTATCAAG | 188 / 178                 | 2.0 / 55                                        |
| <i>pho2-1</i><br>dCAPS | 14.286               | T1B8      | <i>pho2-1</i><br>SNP       | TGAAGAAAGTCCACAAAGAA<br>TCGTGTCTGTTCAACAAA         | 197 / 214                 | 2.0 / 50                                        |
| mpi19                  | 14.305               | T1B8      | CER459006<br>INDEL45       | TGCCAAACCAAATATCAACT<br>AGCTGATGAACAAAAGACTGA      | 203 / 158                 | 2.0 / 50                                        |
| mpi20                  | 14.327               | T1B8      | CER459010<br>INDEL18       | ACATTGAAAGTTCCCGATTCT<br>CAACAGATTTCTTTGACCCA      | 90 / 72                   | 2.0 / 50                                        |
| mpi18                  | 14.388               | T14G11    | CER458319<br>INDEL26       | AGGGAATCGCAGAGTCAATAG<br>GGCTGTGATGTCATTGTTACG     | 96 / 70                   | 2.0 / 50                                        |
| mpi16                  | 14.484               | F13P17    | CER449098<br>INDEL9        | CGGATCTTACTACTCGAAGAA<br>GGGTATTGCTTTTGATGTATT     | 120 / 111                 | 1.5 / 55                                        |
| mpi14                  | 14.800               | T4C15     | CER460568<br>INDEL8        | TTGAGGTTACTCCTTAAATCGG<br>AGCGACGAGTGTATATGCAG     | 172 / 164                 | 2.0 / 50                                        |
| mpi12                  | 15.152               | F11F19    | CER448624<br>INDEL12       | TTCCAGAGAGAAGAAAACGAAA<br>AGATGTTGAGAGCGGGTGT      | 165 / 153                 | 2.0 / 55                                        |
| nga168                 | 16.299               | T7F6      | CER461057<br>INDEL16       | GAGGACATGTATAGGAGCCTCG<br>TCGTCTACTGCACTGCCG       | 151 / 135                 | 1.5 / 55                                        |
| mpi17                  | 17.622               | T24P15    | CER459672<br>INDEL12       | CATTGCTGAAGTTCTTTTTC<br>TTTTCCACATTTCTTTAGGC       | 175 / 163                 | 2.5 / 53                                        |

Mb: megabase; bp: base pair; Col: WT Columbia-0; Ler: WT Landsberg *erecta*; Ta: annealing temperature used for PCR amplification. Mismatched nucleotides in the dCAPS marker forward primer are underlined.

**Table S3.** Primers used for qRT-PCR analysis.

| AGI                     | Forward Primer<br>(5'→3')    | Reverse Primer<br>(5'→3')    |
|-------------------------|------------------------------|------------------------------|
| <i>At1g73220</i>        | CGGATCTCTTTTCGGTTCTGGTGT     | GCAAAGGCCGTGACGAAAGTTAA      |
| <i>At3g02040</i>        | CGATGTTTCAGGTCACCCAGAGATGG   | TGACCCTCTTCTCGTACACCACTC     |
| <i>At3g17790</i>        | AGTGGTACAGTGTTTTGGGAAACC     | TCTCTACCAACTCTGCATCAACGA     |
| <i>At3g47420</i>        | GCCATACAGCGATTGAAGGCGAA      | CCAGCCATGATTCCACCAACCA       |
| <i>At5g20150</i>        | CCAATTGTTAGAAGACGAGTTGGA     | CCATTGAATCCTTAGCTTTTCGCAA    |
| <i>At5g20790</i>        | AGCTACGGAGGAGGTTTGGGTAAT     | CTCATCCTCACCCTCATCCCAT       |
| <i>At3g09922 AtIPS1</i> | AGACTGCAGAAGGCTGATTGAGA      | TTGCCAATTTCTAGAGGGAGA        |
| <i>At5g03545 AT4</i>    | CTGAAGCTCAAGAACCCTCTGAA      | CCTCTCAAAACCCTTTATTGGTGA     |
| <i>At2g33770_1</i>      | AATCTGGTTTACTTCGCATGAGCT     | CATTACGCATACTCCACAAG         |
| <i>At2g33770_2</i>      | AGGTTTGAAGCTCCACCCTCA        | CCCAAGATGTGATTGGAGTTCC       |
| <i>At2g33770_3</i>      | CCCCTTTGAAGTTTATCCAACCTGG    | AGGTGAGCCAACTGAGGACTCC       |
| <i>At2g33770_4</i>      | AGCTGACCCTGTGCTCAGTC         | CGGTGTAGCTTCCCTGTTTGT        |
| <i>At2g33770_5</i>      | GTGAAGGACCATTTTACGCACC       | CCATATAAGCCTTGCACGCAG        |
| <i>At4g05320 UBQ10</i>  | GGCCTTGATAAATCCCTGATGAATAAG  | AAAGAGATAACAGGAACGGAAACATAGT |
| <i>At5g43350 Pht1;1</i> | GAGCTCTAGGAAATGGCCGAAC       | TGACAATCGCCGTGAATGA          |
| <i>At5g43370 Pht1;2</i> | AAGGTGGATGCAGGATACCCA        | GAACACCAAGCAGATCAATGA        |
| <i>At5g43360 Pht1;3</i> | GCTCAGTTGCTTCCGGTCTTT        | ACCCGAGCCAAAACCTGAA          |
| <i>At2g38940 Pht1;4</i> | TCAATGGCGTTGCCTTCTGT         | ATCACAAGCCACCCGAAA           |
| <i>At2g32830 Pht1;5</i> | GCCGCAAGAAAGTTTACGGTAT       | GATAGACCAGACCCGAGAGAACA      |
| <i>At5g43340 Pht1;6</i> | CGGACTCCACTTACTCGGAACA       | GCTGTAGAAAAGCGATGTCGAGG      |
| <i>At3g54700 Pht1;7</i> | ATGTTTCTTCCGGTCTGCGT         | CGTGGCGGATAACGGATAATC        |
| <i>At1g20860 Pht1;8</i> | ACTGCAGAAAACGTCTACGACG       | CAGCGATGATGGCTCCTAATTC       |
| <i>At1g76430 Pht1;9</i> | CGTCGGTGAAAAGTCCCATTC        | CGCAGCGAGGATACAGTGGTA        |
| <i>At3g26570 Pht2;1</i> | GCAGCTGGAACCTGGTTACAGG       | CCAACCATTGATCCGACGATAC       |
| <i>At5g14040 Pht3;1</i> | TCGTTTCTCATCCAGCAGACAA       | AATCTTCTCACCGCATCTCCA        |
| <i>At3g48850 Pht3;2</i> | TTTAGCTGGATTGCCAACCACT       | TACAGATGGAGCAAGCGCAGT        |
| <i>At2g17270 Pht3;3</i> | ATGTGTTGCAGGCTGTGAGGA        | TGATCCGAACAGGAAGGCTTC        |
| <i>Ath-miR399a</i>      | AGGGTAAGATCTCTATTGGCAGGAAAC  | GCAGAAGAATTACAGGGCAAACTCC    |
| <i>Ath-miR399b</i>      | TCTCCATTGGCAGGTCCTTTACTTCC   | TCAGGGCAACTCTCCTTTGGCAG      |
| <i>Ath-miR399c</i>      | CATCTTTCTATTGGCAGGCGACTTGG   | AAGCAGTGACAGGGCAACTCTCC      |
| <i>Ath-miR399d</i>      | AATACTCCTATGGCAGATCGCATTGG   | TCCTTTGGCAGAGAAGCATTTTACTTG  |
| <i>Ath-miR399e</i>      | CTCTATTGGCAGTGGAAAGTTGATGACC | ACGTTAGTGAAGCATTGCGAGGC      |
| <i>Ath-miR399f</i>      | GCATTACAGGGCAAGATCACCATTGG   | GCGCAAGAGAATTACCGGGCAAAATC   |
| <i>Ath-miR393a</i>      | GGGATCGCATTGATCCTAATTAAGGTG  | TCCAAAGAGATAGCATGATCCAAAACC  |
| <i>Ath-miR395a</i>      | GAGTTCCTCTGAGCACTTCAATGGG    | CGTTGAATGGGTCCGGGAGTTC       |
| <i>Ath-miR159a</i>      | TTCAAACATGAGTTGAGCAGGGTAAAG  | AGGGCAAGTTAAAGCTCCTGAGATATG  |
| <i>Ath-miR164a</i>      | CGAAATCCGTCTCATTTGCTTATTTGC  | AGCTCATGTTGGAGAAGTTAAGTACG   |
| <i>Ath-miR170</i>       | TGATATTGGCCTGGTTCACTCAGATTG  | AATACGAGAGAAGCGACGAGAGAGG    |
| <i>Ath-miR171a</i>      | TTCTCACTTCTCCTCCTCACACTTCAC  | GCCAATATCAAAGGGACTCTCTCATGC  |
| <i>Os1g52230</i>        | TCTTCACTCGACACCATCCTCG       | GGTTGGTGTGATCTCGGAGAA        |
| <i>Os1g59150</i>        | GGAGTCACATGCTGCCTAAGGTT      | TCACTGCCAGCTTACGGAGG         |
| <i>Os-miR399a</i>       | GCTGGAATGATGCTGGTAGC         | CTCCTTTGGCAGGATCTGT          |
| <i>Os-miR399d</i>       | GGTGGCCTTTGATAGACCATCA       | GCAGGGCCGTTTTGGTGAAT         |
| <i>Os-miR399f</i>       | GGCAGAGGTGATCAGATTGCA        | GGCAAATCTCCTTTGGCAGAG        |
| <i>Os-miR399j</i>       | GGAGCATGTGAAGTCTTTGTAGC      | GGCAACTCTCCTTTGGCAGA         |
| <i>GUS</i>              | GCCGTTTTTCGTGGTAATCAC        | TGAACAACGAACTGAACTGGCA       |

**Fig. S1.** Fine mapping of the *PHO2* locus.

(A) Representation of Arabidopsis chromosome 2 in the region between 12.5 and 16.5 megabases, showing the positions of markers m429 and as1, that were found previously to be linked to the *pho2* mutation (Delhaize and Randall, 1995), and those of SSLP markers nga361, mpi11-mpi16 and nga168. AGI-BAC clones containing the markers are represented by white boxes. The number of recombination events (meiotic breakpoints) found for each marker in a total of 7872 examined chromosomes is given. Recombination events upstream or downstream of *PHO2* are shown in the upper or lower row, respectively. (B) Close-up of the region between flanking SSLP markers mpi15 (CER458994) and mpi16, showing the names, the non-overlapping (open boxes) and overlapping parts (hatched boxes) of BAC clones, as well as the position and the number of recombinants found for three additional SSLPs (Table S2). Using these markers the *PHO2* gene was mapped between polymorphisms CER458994 and CER459010. (C) The *pho2*-1 point mutation are detectable by PCR using a co-dominant dCAPS marker that exploits a *MspI* restriction site (CAPyN<sub>4</sub>PuTG) which is created with a mismatched primer (Table S3). Primer sequences are underlined and exon sequence is shown in capital letters. While the WT PCR product can be digested by *MspI* resulting in a 197 bp fragment, the *pho2* mutant product remains uncleaved. *pho2* mutants complemented with genomic WT cosmids C23 and C3 display a heterozygous PCR genotype.

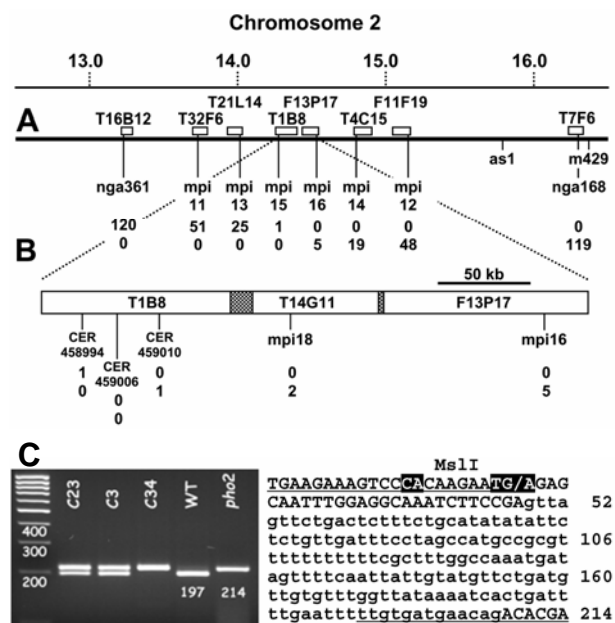

**Fig. S2.** ATH1 genechip® expression profile of the *PHO2* gene.

**(A)** Developmental series. A full description of samples #1-#101 is available at <http://www.weigelworld.org/resources/microarray/AtGenExpress/>. **(B, C)** Abiotic stress series for (B) shoots and (C) roots. A detailed description of the samples and plant growth conditions is available at <http://web.uni-frankfurt.de/fb15/botanik/mcb/AFGN/atgenextable2.htm>. **(D)** Hormone series. WT Col-0 seedlings were grown in liquid MS medium for seven days at 23°C treated with IAA, zeatin, GA3, ABA, MJ, ACC or BL for 30 minutes, 1 or 3 hours. **(E)** Nutrient starvation and re-addition series. WT Col-0 seedlings were grown as described (51). Full nutrition (FN); sulfur, nitrogen, phosphorus or carbon starvation (-S, -N, -P, -C, respectively); 30 min or 3 hrs sulfate (SO<sub>4</sub>), nitrate (NO<sub>3</sub>), phosphate (PO<sub>4</sub>) or sucrose (suc) re-addition. **(F)** Diurnal series / extended night. WT Col-0 plants were grown and harvested as described (48). **(G)** Light series. A detailed description of the samples is available at <http://web.uni-frankfurt.de/fb15/botanik/mcb/AFGN/atgenextable3.htm>. **(H)** Biotic stress series. A detailed description of the samples is available at <http://web.uni-frankfurt.de/fb15/botanik/mcb/AFGN/atgenextable3.htm>.

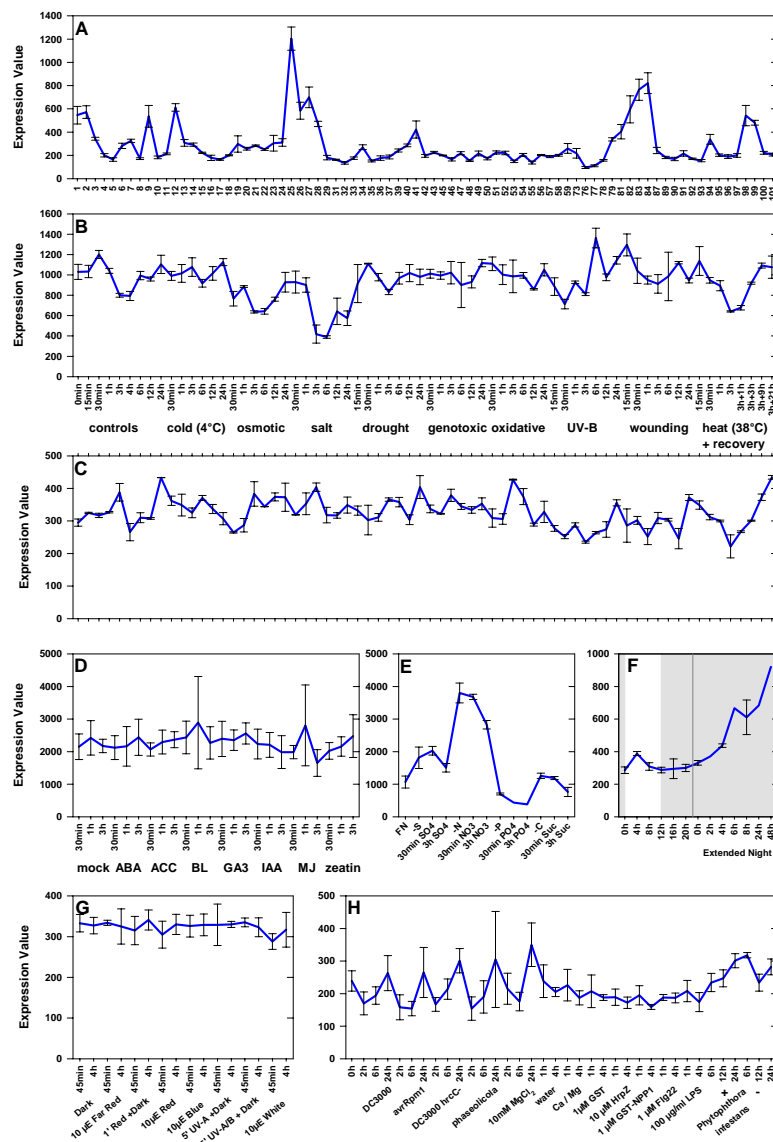

**Fig. S3.** Expression of *GUS* under control of ~1.8kb *PHO2* upstream sequence.

*GUS* driven by ~1.8kb of *PHO2* upstream sequence is expressed throughout development and in all organs of Pi-replete grown *Arabidopsis* plants. (A) Five day old seedling, (B) Magnification of the primary root of a five day old seedling, (C) 20 days-old plantlet grown on an agar plate, (D) 30 days-old plant grown in soil, (E) Magnified view of a flower from a 30 days-old soil-grown plant.

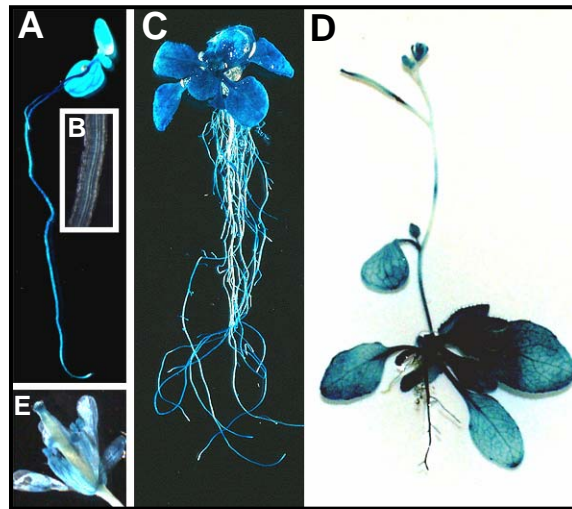

**Fig. S4.** Depiction of *PHO2* gene structure and positions of qRT-PCR primers.

(A) *PHO2* gene structure. Exons are shown as boxes. UTRs are shaded yellow, and coding regions are shown in shades of blue and red (UBC domain). The ticks in the second exon of the 5'-UTR depict the position of the five miR399 binding sites (miR BS). The sequence of the region around the five miR399 binding sites and a miR399 consensus sequence are shown below. (B) Depiction of the *PHO2* cDNA sequence. Binding sites for miR399 are shaded yellow, and qRT-PCR primer pairs (cf. Table S3), used for *PHO2* transcript/cDNA quantification, are shown as colored arrows.

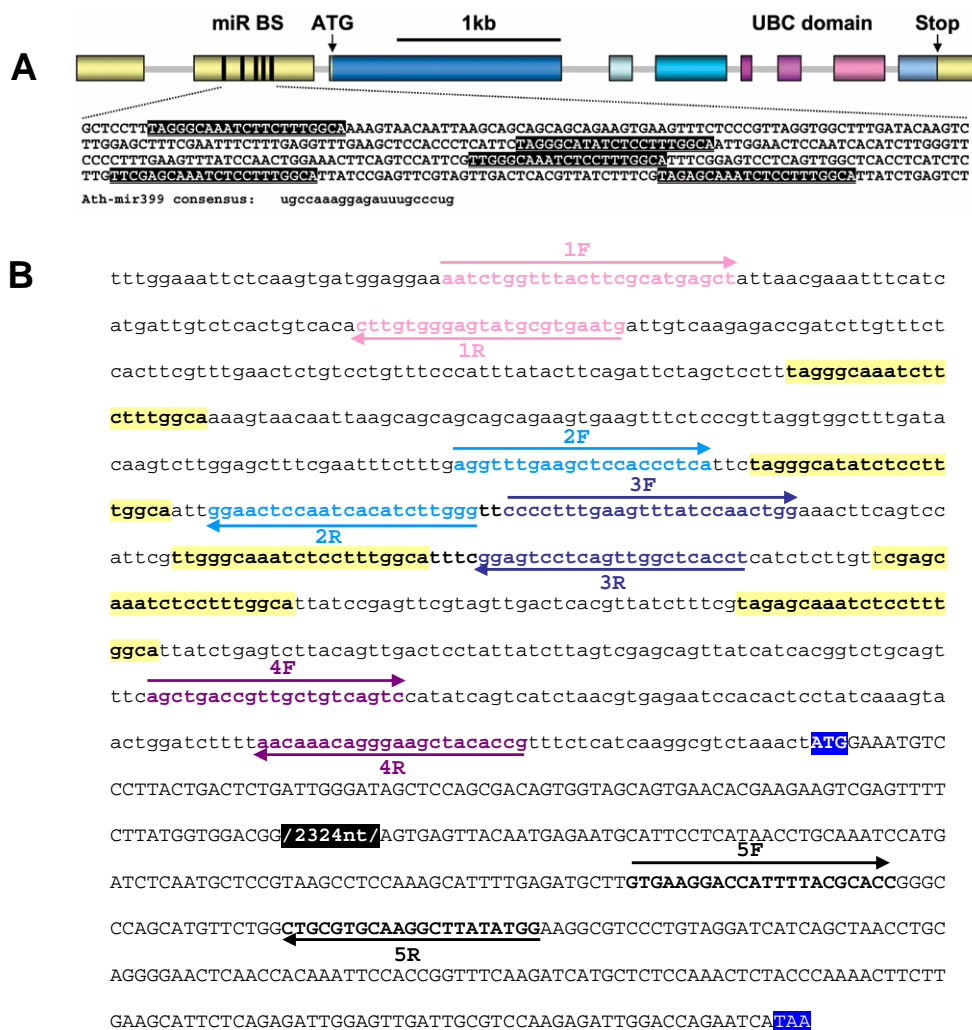

**Fig. S5.** qRT-PCR expression levels of *PHO2* and miR399 PTs.

Results are shown for shoots and roots of WT seedlings grown in Pi-replete and Pi-depleted conditions (see the legend in the graph). Expression of the miR399e/f PT was investigated with two qRT-PCR primer pairs (indicated by the bracket) designed on the stem-loop structures of the miR399e and miR399f precursors. Expression levels are given on a log scale as described in the legend to Fig. 3.

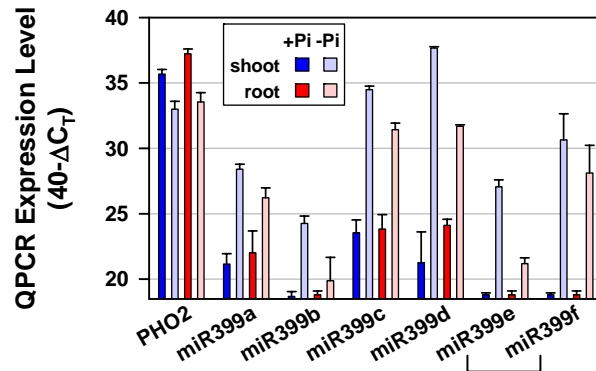

**Fig. S6.** qRT-PCR expression levels of 64 Pi-responsive transcripts in Pi-depleted and -replete WT, Pi-depleted *phr1* mutant and Pi-replete *pho2* seedlings.

The expression levels ( $40-\Delta C_T$ ; mean  $\pm$  SD, n=4) are given on a log scale as described in the legend to Fig. 3. Transcript level was considered altered if  $\Delta\Delta C_T > 1$ .

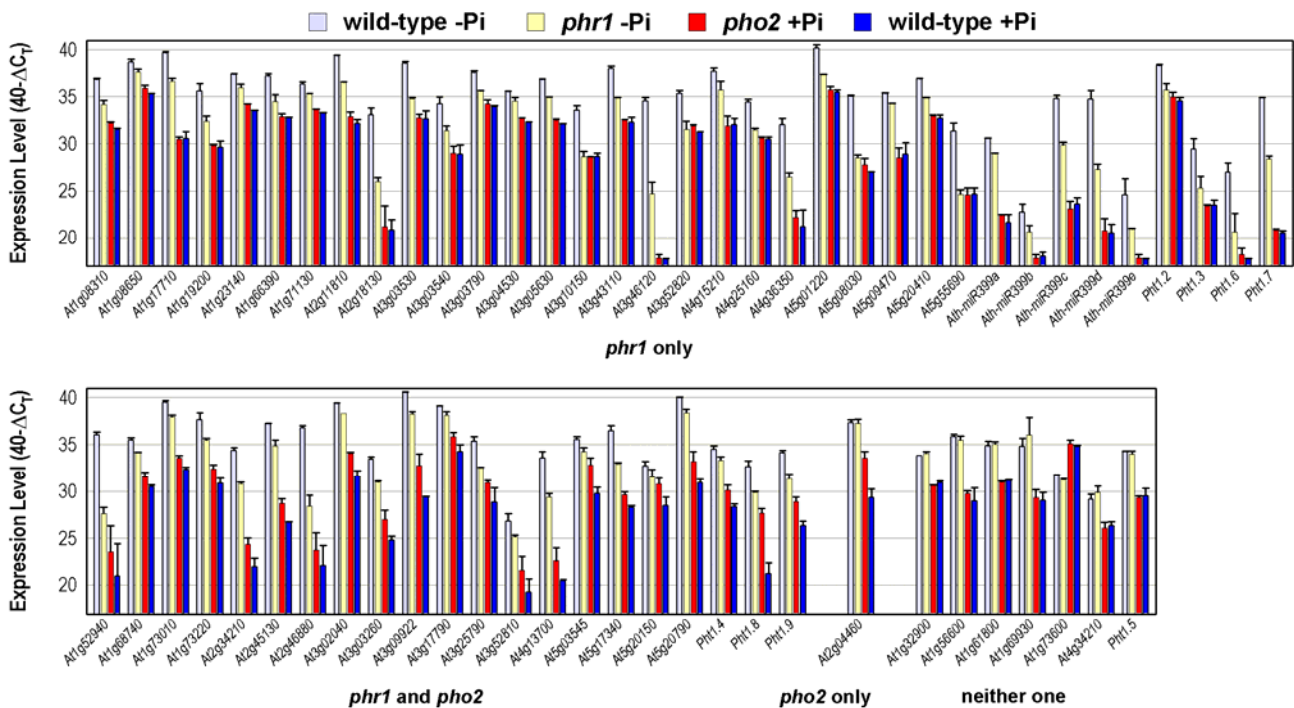

**Fig. S7.** Protein alignment of *AtPHO2* and three potential plant orthologs.

**(A)** Sequences of the five miR399 binding sites in the 5'-UTRs of the four potential orthologs. **(B)** Protein alignment. Colored lines depict the regions encoded by the various exons as shown in Fig. 6D. The UBC domain is underlined with circles. **(C)** Protein identity and similarity of PHO2 and its potential rice, *Medicago* and poplar orthologs. Similarity and identity values (%) for pair-wise comparisons are shown with blue and yellow background, respectively. Values for the entire protein, the UBC domain, the N-terminal region (amino acids 1-250) and the C-terminal region are given in black, red, blue and green numbers, respectively.

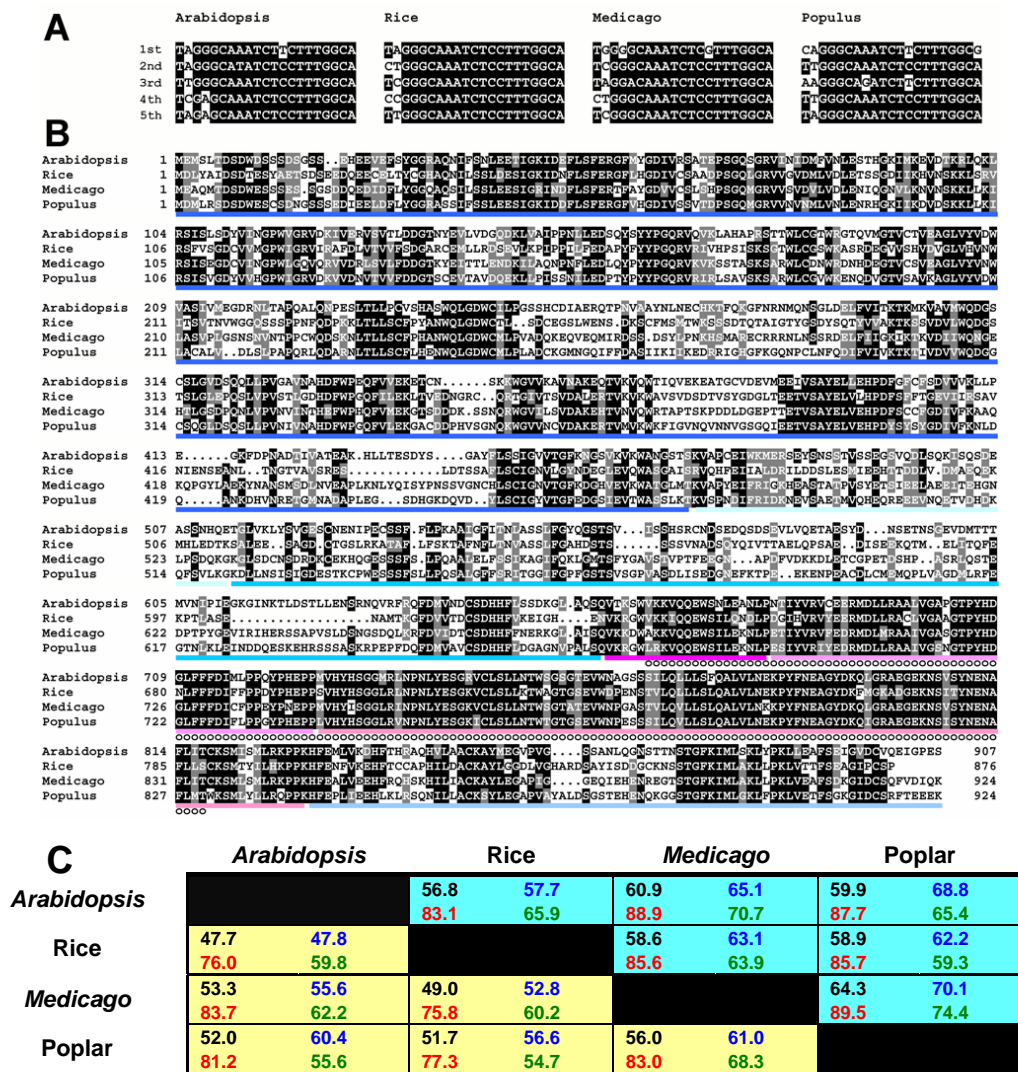

Supplement: plntphys_pp.106.079707_1.pdf [file plntphys_pp.106.079707_1.pdf]
